# Supplementary material
Source: HighWire-hosted journal article supplement (https://gut.bmj.com/content/69/6/1002)
Supplement: inline-supplementary-material-1 [file inline-supplementary-material-1.pdf]

## Supplementary material-ZJ01 sequence

>BataCov/Zhejiang/ZJ01/2019

```
TAAAGGTTTATACCTTCCCAGGTAACAAACCAACCAACTTTTCGATCTCTT
GTAGATCTGTTCTCTAAACGAACTTTAAAATCTGTGTGGCTGCTACTCGG
CTGCATGCTTAGTGCACTCACGCAGTATAATTAATAACTAATTACTGTGCG
TTGACAGGACACGAGTAACTCGTCTATCTTCTGCAGGCTGCTTACGGTTT
CGTCCGTGTTGCAGCCGATCATCAGCACATCTAGGTTTCGTCCGGGTGTG
ACCGAAAAGGTAAGATGGAGAGCCTTGTCCCTGGTTTCAACGAGAAAACAC
ACGTCCAACCTCAGTTTGCCTGTTTTACAGGTTTCGCGACGTGCTCGTACGT
GGCTTTGGAGACTCCGTGGAGGAGGTCTTATCAGAGGCACGTCAACATCT
TAAAGATGGCACTTGTGGCTTAGTAGAAGTTGAAAAAGGCGTTTTGCCTC
AACTTGAACAGCCCTATGTGTTTCATCAAACGTTTCGGATGCTCGAACTGCA
CCTCATGGTCATGTTATGGTTGAGCTGGTAGCAGAACTCGAAGGCATTCA
GTACGGTCGTAGTGGTGAGACACTTGGTGTCTTGTCCCTCATGTGGGCG
AAATACCAGTGGCTTACCGCAAGGTTCTTCTTCGTAAGAACGGTAATAAAA
GGAGCTGGTGGCCATAGTTACGGCGCCGATCTAAAGTCATTTGACTTAGG
CGACGAGCTTGGCACTGATCCTTATGAAGATTTTCAAGAAAACCTGGAACA
CTAAACATAGCAGTGGTGTACCCGTGAACTCATGCGTGAGCTTAACGGA
GGGGCATACTCGCTATGTCGATAACAACCTTCTGTGGCCCTGATGGCTA
CCCTCTTGAGTGCATTAAGACCTTCTAGCACGTGCTGGTAAAGCTTCAT
GCACTTTGTCCGAACAACCTGGACTTTATTGACACTAAGAGGGGTGTATAC
TGCTGCCGTGAACATGAGCATGAAATTGCTTGGTACACGGAACGTTCTGA
AAAGAGCTATGAATTGCAGACACCTTTTCAAATTAATTTGGCAAAGAAAT
TTGACACCTTCAATGGGGAATGTCCAAATTTTGTATTTCCCTTAAATTC
ATAATCAAGACTATTCAACCAAGGGTTGAAAAGAAAAGCTTGATGGCTT
TATGGGTAGAATTTCGATCTGTCTATCCAGTTGCGTCACCAAATGAATGCA
ACCAAATGTGCCTTTCAACTCTCATGAAGTGTGATCATTGTGGTGAACCT
TCATGGCAGACGGGCGATTTTGTAAAGCCACTTGCGAATTTTGTGGCAC
TGAGAAATTTGACTAAAGAAGGTGCCACTACTTGTGGTTACTTACCCAAA
ATGCTGTTGTTAAAATTTATTGTCCAGCATGTCACAATTCAGAAGTAGGA
CCTGAGCATAGTCTTGCCGAATACCATAATGAATCTGGCTTGAAAACCAT
TCTTCGTAAGGGTGGTTCGCACTATTGCCTTTGGAGGCTGTGTGTTCTCTT
ATGTTGGTTGCCATAACAAGTGTGCCTATTGGGTTCCACGTGCTAGCGCT
AACATAGGTTGTAACCATAACAGGTGTTGTTGGAGAAGGTTCCGAAGGTCT
TAATGACAACCTTCTTGAATACTCCAAAAGAGAAAAGTCAACATCAATA
TTGTTGGTGACTTTAACTTAATGAAGAGATCGCCATTATTTTGGCATCT
TTTTCTGCTCCACAAGTGCTTTTGTGGAACTGTGAAAGGTTTGGATTA
TAAAGCATTCAAACAAATTGTTGAATCCTGTGGTAATTTTAAAGTTACAA
AAGGAAAAGCTAAAAAAGGTGCCTGGAATATTGGTGAACAGAAATCAATA
CTGAGTCTCTTTATGCATTTGCATCAGAGGCTGCTCGTGTGTACGATC
AATTTTCTCCCGCACTCTTGAACCTGCTCAAAATCTGTGCGTGTTTTAC
AGAAGGCCGCTATAACAATACTAGATGGAATTTACAGTATTCACTGAGA
CTCATTGATGCTATGATGTTACATCTGATTTGGCTACTAACAATCTAGT
```

TGTAATGGCCTACATTACAGGTGGTGTGTTTCAGTTGACTTCGCAGTGGC  
TAACTAACATCTTTGGCACTGTTTATGAAAACTCAAACCCGTCCTTGAT  
TGGCTTGAAGAGAAGTTAAGGAAGGTGTAGAGTTTCTTAGAGACGGTTG  
GGAAATTGTTAAATTTATCTCAACCTGTGCTTGTGAAATTGTCGGTGGAC  
AAATTGTCACCTGTGCAAAGGAAATTAAGGAGAGTGTTCAGACATTCTTT  
AAGCTTGTAATAAATTTTTGGCTTTGTGTGCTGACTCTATCATTATTGG  
TGGAGCTAAACTTAAAGCCTTGAATTTAGGTGAAACATTTGTCACGCACT  
CAAAGGGATTGTACAGAAAGTGTGTTAAATCCAGAGAAGAACTGGCCTA  
CTCATGCCTCTAAAAGCCCCAAAAGAAATTATCTTCTTAGAGGGAGAAAC  
ACTTCCCACAGAAGTGTTAACAGAGGAAGTTGTCTTGGAACTGGTGATT  
TACAACCATTAGAACAACCTACTAGTGAAGCTGTTGAAGCTCATTGGTT  
GGTACACCAGTTTGTATTAACGGGCTTATGTTGCTCGAAATCAAAGACAC  
AGAAAAGTACTGTGCCCTTGACCTAATATGATGGTAACAAACAATACCT  
TCACACTCAAAGGCGGTGCACCAACAAAGGTTACTTTTGGTGATGACACT  
GTGATAGAAGTGCAAGGTTACAAGAGTGTGAATATCACTTTGAACTGA  
TGAAAGGATTGATAAAGTACTTAATGAGAAGTGTCTGCCTATACAGTTG  
AACTCGGTACAGAAGTAAATGAGTTCGCCTGTGTTGTGGCAGATGCTGTC  
ATAAAAACTTTGCAACCAGTATCTGAATTACTTACACCACTGGGCATTGA  
TTTAGATGAGTGGAGTATGGCTACATACTACTTATTTGATGAGTCTGGTG  
AGTTTAAATTGGCTTACATATGTATTGTTCTTTCTACCCTCCAGATGAG  
GATGAAGAAGAAGGTGATTGTGAAGAAGAAGAGTTTGAGCCATCAACTCA  
ATATGAGTATGGTACTGAAGATGATTACCAAGGTAAACCTTTGGAATTTG  
GTGCCACTTCTGCTGCTCTTCAACCTGAAGAAGAGCAAGAAGAAGATTGG  
TTAGATGATGATAGTCAACAACTGTTGGTCAACAAGACGGCAGTGAGGA  
CAATCAGACAACACTACTATTCAACAATTGTTGAGGTTCAACCTCAATTAG  
AGATGGAACCTTACACCAGTTGTTTCAACTATTGAAGTGAATAGTTTTAGT  
GGTATTTAAACTTACTGACAATGTATACATTAATAAATGCAGACATTGT  
GGAAGAAGCTAAAAGGTAAAACCAACAGTGGTTGTTAATGCAGCCAATG  
TTTACCTTAAACATGGAGGAGGTGTTGCAGGAGCCTTAAATAAGGCTACT  
AACAATGCCATGCAAGTTGAATCTGATGATTACATAGCTACTATGGACCA  
CTTAAAGTGGGTGGTAGTTGTGTTTTAAGCGGACACAATCTTGCTAAACA  
CTGTCTTATGTTGTCGGCCAAATGTTAACAAGGTGAAGACATTCAAC  
TTCTAAGAGTGCTTATGAAAATTTAATCAGCACGAAGTTCTACTTGCA  
CCATTATTATCAGCTGGTATTTTTGGTGCTGACCCTATACATTCTTTAAG  
AGTTTGTGTAGATACTGTTTCGCACAAATGTCTACTTAGCTGTCTTTGATA  
AAAATCTCTATGACAACTTGTTCAGCTTTTTGGAAATGAAGAGTGAA  
AAGCAAGTTGAACAAAAGATCGCTGAGATTCTAAAGAGGAAGTTAAGCC  
ATTTATAACTGAAAGTAAACCTTCAAGTTGAACAGAGAAAACAAGATGATA  
AGAAAATCAAAGCTTGTGTTGAAGAAGTTACAACAACCTCTGGAAGAACT  
AAGTTCCTCACAGAAAACCTGTTACTTTATATTGACATTAATGGCAATCT  
TCATCCAGATTCTGCCACTCTTGTAGTGACATTGACATCACTTTCTTAA  
AGAAAGATGCTCCATATATAGTGGGTGATGTTGTTCAAGAGGGTGTTTTA  
ACTGCTGTGGTTATACCTACTAAAAGGCTGGTGGCACTACTGAAATGCT  
AGCGAAAGCTTTGAGAAAAGTGCCAACAGACAATTATATAACCACTTACC

CGGGTCAGGGTTTAAATGGTTACACTGTAGAGGAGGCAAAGACAGTGCTT  
AAAAAGTGAAAAGTGCCTTTTACATTCTACCATCTATTATCTCTAATGA  
GAAGCAAGAAATCTTGAACTGTTTCTTGGAAATTTGCGAGAAATGCTTG  
CACATGCAGAAGAAACACGCAAATTAATGCCTGTCTGTGTGGAAACTAAA  
GCCATAGTTTCAACTATACAGCGTAAATATAAGGGTATTAATAACAAGA  
GGGTGTGGTTGATTATGGTGCTAGATTTTACTTTTACACCAGTAAAACAA  
CTGTAGCGTCACTTATCAACACACTTAACGATCTAAATGAAACTCTTGTT  
ACAATGCCACTTGGCTATGTAACACATGGCTTAAATTTGGAAGAAGCTGC  
TCGGTATATGAGATCTCTCAAAGTGCCAGCTACAGTTTCTGTTTCTCAC  
CTGATGCTGTTACAGCGTATAATGGTTATCTTACTTCTTCTTAAAACA  
CCTGAAGAACATTTTATTGAAACCATCTCACTTGCTGGTTCCTATAAAGA  
TTGGTCTATTCTGGACAATCTACACAAGTATAGAATTTCTTAAGA  
GAGGTGATAAAAGTGATATTACACTAGTAATCCTACCACATTCACCTAG  
ATGTGAAGTTATCACCTTTGACAATCTTAAGACACTTCTTTCTTTGAGAG  
AAGTGAGGACTATTAAGGTGTTTACAACAGTAGACAACATTAACCTCCAC  
ACGCAAGTTGTGGACATGTCAATGACATATGGACAACAGTTTGGTCCAAC  
TTATTTGGATGGAGCTGATGTTACTAAAATAAAACCTCATAATTCACATG  
AAGGTA AACATTTTATGTTTTACCTAATGATGACACTCTACGTGTTGAG  
GCTTTTGAGTACTACCACACAAGTATCCTAGTTTTCTGGGTAGGTACAT  
GTCAGCATTAAATCACACTAAAAAGTGGAAATACCCACAAGTTAATGGTT  
TAACTTCTATTAATGGGCAGATAACAAGTATCTTGCCACTGCATTG  
TTAACTCCAACAATAGAGTTGAAGTTAATCCACCTGCTCTACAAGA  
TGCTTATTACAGAGCAAGGGCTGGTGAAGCTGCTAACTTTTGTGCACTTA  
TCTTAGCCTACTGTAATAAGACAGTAGGTGAGTTAGGTGATGTTAGAGAA  
ACAATGAGTTACTTGTTC AACATGCCAATTTAGATTCTTGCAAAAAGAGT  
CTTGAACGTGGTGTGTA AAACTTGTGGACAACAGCAGACAACCCCTAAGG  
GTGTAGAAGCTGTTATGTACATGGGCACACTTTCTTATGAACAATTTAAG  
AAAGGTGTT CAGATACCTTG TACGTGTGGTAAACAAGCTACAAAATATCT  
AGTACAACAGGAGTACCTTTTGTATGATGTCAGCACCACTGCTCAGT  
ATGAACTTAAGCATGGTACATTTACTTGTGCTAGTGAGTACACTGGTAAT  
TACCAGTGTGGTCACTATAAACATATAACTTCTAAAGAACTTTGTATTG  
CATAGACGGTGTCTTACTTACAAAGTCTCAGAATACAAAGGTCCTATTA  
CGGATGTTTTCTACAAAGAAAACAGTTACACAACAACCATAAAACAGTT  
ACTTATAAATTGGATGGTGTGTTTGTACAGAAATTGACCCTAAGTTGGA  
CAATTATTATAAGAAAGACAATTCTTATTTACAGAGCAACCAATTGATC  
TTGTACCAACCAACCATATCCAACGCAAGCTTCGATAATTTAAGTTT  
GTATGTGATAATATCAAATTTGCTGATGATTTAAACCAGTTAACTGGTTA  
TAAGAAACCTGCTTCAAGAGAGCTTAAAGTTACATTTTTCCCTGACTTAA  
ATGGTGATGTGGTGGCTATTGATTATAAACTACACACCCTCTTTAAG  
AAAGGAGCTAAATTGTTACATAAACCTATTGTTTGGCATGTTAACAATGC  
AACTAATAAAGCCAGTATAAACCAAATACCTGGTGTATACGTTGTCTTT  
GGAGCACAAAACAGTTGAAACATCAAATTCGTTTGATGTACTGAAGTCA  
GAGGACGCGCAGGGAATGGATAATCTTGCCTGCGAAGATCTAAAACAGT  
CTCTGAAGAAGTAGTGAAAATCCTACCATACAGAAAGACGTTCTTGAGT

GTAATGTGAAAACCTACCGAAGTTGTAGGAGACATTATACTTAAACCAGCA  
AATAATAGTTTAAAAATTACAGAAGAGGTTGCCACACAGATCTAATGGC  
TGCTTATGTAGACATTCTAGTCTTACTATTAAGAAACCTAATGAATTATC  
TAGAGTATTAGGTTTAAAAACCCTTGCTACTCATGGTTTAGCTGCTGTTA  
ATAGTGCCCTTGGGATACTATAGCTAATTATGCTAAGCCTTTTCTTAAC  
AAAGTTGTTAGTACAACCTACTAACATAGTTACACGGTGTAAACCCTGT  
TTGCTACTAATTATATGCCTTATTTCTTACTTTATTGCTACAATTGTGTA  
CTTTTACTAGAAGTACAAATTCTAGAATTAAGCATCAATCCCGACTACC  
ATGGCAAAGAATACTGTTAAGAGTGTGGTTAATTTTGTCTACAGGCTTC  
ATTTAATTATTTGAAGTCACCTAATTTTTCTAACTGATAAATATTATAA  
TTTGGTTTTTACTATTAAGTGTTCCTAGGTTCTTTAATCTACTCAACC  
GCTGCTTAGGTGTTTTAATGTCTAATTTAGGCATGCCTTCTACTGTAC  
TGGATACAGAGAAGGCTATTTGAACTCTACTAATGCTACTATTGCAACCT  
ACTGTACTGGTTCTATACCTGTAGTGTTCCTTAGTGGTTTAGATTCT  
TTAGACACCTATCCTTCTTAGAACTATACAAATTACCATTTTCATCTT  
TAAATGGGATTTAACTGCTTTTGGCTTAGTTGCAGAGTGGTTTTTGGCAT  
ATATTCTTTTCACTAGGTTTTTCTATGTACTTGGATTGGCTGCAATCATG  
CAATTGTTTTTCAGCTATTTTGCAGTACATTTTATTAGTAATTCTTGGCT  
TATGTGGTTAATAATTAATCTTGTACAAATGGCCCCGATTTTCAGCTATGG  
TTAGAATGTACATCTTCTTGCATCATTTTATTATGTATGGAAAAGTTAT  
GTGCATGTTGTAGACGGTTGTAATTCATCAACTTGTATGATGTGTTACAA  
ACGTAATAGAGCAACAAGAGTCAATGTACACCTATTGTTAATGGTGTTA  
GAAGGTCCTTTTATGTCTATGATAATGGAGGTAAAGGCTTTTGCAACTA  
CACAATTGGAATTGTGTTAATTGTGATACATTCTGTGCTGGTAGTACATT  
TATTAGTGATGAAGTTGCGAGAGACTTGTCACTACAGTTTAAAAGACCAA  
TAAATCCTACTGACCAGTCTTCTTACATCGTTGATAGTGTACAGTGAAG  
AATGGTTCCATCCATCTTACTTTGATAAAGCTGGTCAAAGACTTATGA  
AAGACATTCTCTCTCTCATTTTGTAACTTAGACAACCTGAGAGCTAATA  
ACACTAAAGGTTCAATGCCTATTAATGTTATAGTTTTTGTGGTAAATCA  
AAATGTGAAGAATCATCTGCAAAATCAGCGTCTGTTTACTACAGTCAGCT  
TATGTGTCAACCTATACTGTTACTAGATCAGGCATTAGTGTCTGATGTTG  
GTGATAGTGCAGGAGTTGCAGTTAAAATGTTTGTGCTTACGTTAATACG  
TTTTCATCAACTTTTAAACGTACCAATGGAAAAACTCAAACACTAGTTGC  
AACTGCAGAAGCTGAACTTGCAAAGAATGTGTCCTTAGACAATGTCTTAT  
CTACTTTTATTTTCAAGCAGCTCGGCAAGGTTTGTGATTGAGATGTAGAA  
ACTAAAGATGTTGTTGAATGTCTTAAATTGTCACATCAATCTGACATAGA  
AGTTACTGGCGATAGTTGTAATAACTATATGCTCACCTATAACAAAGTTG  
AAAACATGACACCCCGTGACCTTGGTGCTTGTATTGACTGTAGTGCAGCT  
CATATTAATGCGCAGGTAGCAAAAAGTCACAACATTGCTTTGATATGGAA  
CGTTAAAGATTTTATGTCATTGTCTGAACAACCTACGAAAACAAATACGTA  
GTGCTGCTAAAAGAATAAATTACCTTTTAAAGTTGACATGTGCAACTACT  
AGACAAGTTGTTAATGTTGTAACAACAAGATAGCACTTAAGGGTGGTAA  
AATTGTTAATAATTGGTTGAAGCAGTTAATTAAGTTACACTTGTGTTCC  
TTTTTGTGCTGCTATTTTCTATTTAATAACACCTGTTTCATGTCATGTCT

AAACATACTGACTTTTTCAAGTGAAATCATAGGATACAAGGCTATTGATGG  
TGGTGTCACTCGTGACATAGCATCTACAGATACTTGTTTTGCTAACAAAC  
ATGCTGATTTTGACACATGGTTTAGTCAGCGTGGTGGTAGTTATACTAAT  
GACAAAGCTTGCCATTGATTGCTGCAGTCATAACAAGAGAAGTGGGTTT  
TGTCGTGCCTGGTTTGCCTGGCAGATATTACGCACAATAATGGTGACT  
TTTTGCATTTCTACCTAGAGTTTTTAGTGCAGTTGGTAACATCTGTTAC  
ACACCATCAAACTTATAGAGTACACTGACTTTGCAACATCAGCTTGTGT  
TTTGGCTGCTGAATGTACAATTTTTAAAGATGCTTCTGGTAAGCCAGTAC  
CATATTGTTATGATACCAATGTAAGGTTCTGTTGCTTATGAAAGT  
TTACGCCCTGACACACGTTATGTGCTCATGGATGGCTCTATTATTCAATT  
TCCTAACACCTACCTGAAGGTTCTGTTAGAGTGGTAACAACCTTTTGATT  
CTGAGTACTGTAGGCACGGCACTTGTAAGATCAGAAGCTGGTGTGTTGT  
GTATCTACTAGTGGTAGATGGGTAACCAATGATTATTACAGATCTTT  
ACCAGGAGTTTTCTGTGGTGTAGATGCTGTAAATTTACTTACTAATATGT  
TTACACCACTAATCAACCTATTGGTGCTTTGGACATATCAGCATCTATA  
GTAGCTGGTGGTATTGTAGCTATCGTAGTAACATGCCTTGCCTACTATTT  
TATGAGGTTTAGAAGAGCTTTTGGTGAATACAGTCATGTAGTTGCCTTTA  
ATACTTTACTATTCCTTATGTCATTCACTGTACTCTGTTTAAACACCAGTT  
TACTCATTCTACCTGGTGTTTATTCTGTTATTTACTTGTACTTGACATT  
TTATCTTACTAATGATGTTTCTTTTTTAGCACATATTCAGTGGATGGTTA  
TGTTACACCTTTAGTACCTTTCTGGATAACAATTGCTTATATCATTGT  
ATTTCCACAAAGCATTCTATTGGTCTTTAGTAATTACCTAAAGAGACG  
TGTAGTCTTTAATGGTGTTCCTTTAGTACTTTTGAAGAAGCTGCGCTGT  
GCACCTTTTGTAAATAAAGAAATGTATCTAAAGTTGCGTAGTGATGTG  
CTATTACCTCTACGCAATATAATAGATACTTAGCTCTTTATAATAAGTA  
CAAGTATTTTAGTGGAGCAATGGATACAACCTAGCTACAGAGAAGCTGCTT  
GTTGTCATCTCGAAAGGCTCTCAATGACTTCAGTAACTCAGGTTCTGAT  
GTTCTTTACCAACCACCACAAACCTCTATCACCTCAGCTGTTTTGCAGAG  
TGGTTTTAGAAAAATGGCATTCCCATCTGGTAAAGTTGAGGGTTGTATGG  
TACAAGTAACTTGTGGTACAACCTAACGGTCTTTGGCTTGATGAC  
GTAGTTTACTGTCCAAGACATGTGATCTGCACCTCTGAAGACATGCTTAA  
CCCTAATTATGAAGATTTACTCATTTCGTAAGTCTAATCATAATTTCTGG  
TACAGGCTGGTAATGTTCAACTCAGGTTATTGGACATTCTATGCAAAAT  
TGTGTACTTAAGCTTAAGGTTGATACAGCCAATCCTAAGACACCTAAGTA  
TAAGTTTGTTCGCAATCAACCAGGACAGACTTTTTTCAGTGTAGCTTGT  
ACAATGGTTCACCATCTGGTGTTTACCAATGTGCTATGAGGCCCAATTC  
ACTATTAAGGGTTCATTCTTAATGGTTCATGTGGTAGTGTGGTTTTAA  
CATAGATTATGACTGTGTCTTTTTGTTACATGCACCATATGGAATTAC  
CAACTGGAGTTCATGCTGGCACAGACTTAGAAGGTAACTTTTATGGACCT  
TTTGTGACAGGCAAACAGCACAAGCAGCTGGTACGGACACAACCTATTAC  
AGTTAATGTTTTAGCTTGGTTGTACGCTGCTGTTATAAATGGAGACAGGT  
GGTTTCTCAATCGATTTACCACAACCTTAATGACTTTAACCTTGTGGCT  
ATGAAGTACAATTATGAACCTCTAACACAAGACCATGTTGACATACTAGG  
ACCTCTTTCTGCTCAAACCTGGAATTGCCGTTTTAGATATGTGTGCTTCAT

TAAAAGAATTACTGCAAAATGGTATGAATGGACGTACCATATTGGGTAGT  
GCTTTATTAGAAGATGAATTTACACCTTTTGATGTTGTTAGACAATGCTC  
AGGTGTTACTTTCCAAAGTGCAGTGAAAAGAACAATCAAGGGTACACACC  
ACTGTTGTTACTCACAATTTTGACTTCACTTTTAGTTTTAGTCCAGAGT  
ACTCAATGGTCTTTGTTCTTTTTTTGTATGAAAATGCCTTTTTACCTTT  
TGCTATGGGTATTATTGCTATGTCTGCTTTTGAATGATGTTTGTCAAAC  
ATAAGCATGCATTTCTCTGTTTGTTTTTGTTACCTTCTCTGCCACTGTA  
GCTTATTTAATATGGTCTATATGCCTGCTAGTTGGGTGATGCGTATTAT  
GACATGGTTGGATATGGTTGATACTAGTTTGTCTGGTTTTAAGCTAAAAG  
ACTGTGTTATGTATGCATCAGCTGTAGTGTACTAATCCTTATGACAGCA  
AGAAGTGTGTATGATGATGGTCTAGGAGAGTGTGGACACTTATGAATGT  
CTTGACACTCGTTTATAAAGTTTATTATGGTAATGCTTTAGATCAAGCCA  
TTCCATGTGGGCTCTTATAATCTCTGTTACTTCTAACTACTCAGGTGTA  
GTTACAAGTGTATGTTTTGGCCAGAGGTATTGTTTTATGTGTGTTGA  
GTATTGCCCTATTTCTCATAACTGGTAATACACTTCAGTGTATAATGC  
TAGTTTATTGTTTCTTAGGCTATTTTTGACTTGTACTTTGGCCTCTTT  
TGTTTACTCAACCGCTACTTTAGACTGACTCTTGGTGTTTATGATTACTT  
AGTTTCTACACAGGAGTTTAGATATATGAATTCACAGGGACTACTCCCAC  
CCAAGAATAGCATAGATGCCTTCAAACCTCAACATTAATTTGTTGGGTGTT  
GGTGGCAAACCTTGATCAAAGTAGCCACTGTACAGTCTAAAATGTCAGA  
TGAAAGTGCACATCAGTAGTCTTACTCTCAGTTTTGCAACAACCTCAGAG  
TAGAATCATCATCTAAATTGTGGGCTCAATGTGTCCAGTTACACAATGAC  
ATTCTTAGCTAAAGATACTACTGAAGCCTTTGAAAAATGGTTTCACT  
ACTTTCTGTTTTGCTTTCCATGCAGGGTGTGTAGACATAAACAAGCTTT  
GTGAAGAAATGCTGGACAACAGGGCAACCTTACAAGCTATAGCCTCAGAG  
TTTAGTTCCCTCCATCATATGCAGCTTTTGCTACTGCTCAAGAAGCTTA  
TGAGCAGGCTGTTGCTAATGGTGATTCTGAAGTTGTTCTTAAAAAGTTGA  
AGAAGTCTTTGAATGTGGCTAAATCTGAATTTGACCGTGATGCAGCCATG  
CAACGTAAGTTGGAAAAGATGGCTGATCAAGCTATGACCCAAATGTATAA  
ACAGGCTAGATCTGAGGACAAGAGGGCAAAGTTACTAGTGCTATGCAGA  
CAATGCTTTTCACTATGCTTAGAAAAGTTGGATAATGATGCACTCAACAAC  
ATTATCAACAATGCAAGAGATGGTTGTGTTCCCTTGAACATAATACCTCT  
TACAACAGCAGCCAAACTAATGGTTGTCATACCAGACTATAACACATATA  
AAAATACGTGTGATGGTACAACATTACTTATGCATCAGCATTGTGGGAAA  
TCCAACAGGTTGTAGATGCAGATAGTAAAATTGTTCAACTTAGTGAAATT  
AGTATGGACAATTCACCTAATTTAGCATGGCCTCTTATTGTAACAGCTTT  
AAGGGCCAATTCTGCTGTCAAATTACAGAATAATGAGCTTAGTCCTGTTG  
CACTACGACAGATGTCTTGTGCTGCCGGTACTACACAACTGCTTGCACT  
GATGACAATGCGTTAGCTTACTACAACACAACAAAGGGAGGTAGGTTTGT  
ACTTGCACTGTTATCCGATTTACAGGATTTGAAATGGGCTAGATTCCCTA  
AGAGTGATGGAAGTGGTACTATCTATACAGAAGTGGAAACCACCTTGTAGG  
TTTGTTACAGACACACCTAAAGGTCCTAAAGTGAAGTATTTATACTTTAT  
TAAAGGATTAACAACCTAAATAGAGGTATGGTACTTGGTAGTTTAGCTG  
CCACAGTACGTCTACAAGCTGGTAATGCAACAGAAGTGCCTGCCAATTCA

ACTGTATTATCTTTCTGTGCTTTTGCTGTAGATGCTGCTAAAGCTTACAA  
AGATTATCTAGCTAGTGGGGGACAACCAATCACTAATTTGTGTTAAGATG  
TTGTGTACACAACACTGGTACTGGTCAGGCAAATAACAGTTACACCGGAA  
GCCAATATGGATCAAAGAATCCTTTGGTGGTGCATCGTGTGTCTGTACT  
GCCGTTGCCACATAGATCATCAAATCCTAAAGGATTTTGTGACTTAAAA  
GGTAAGTATGTACAAATACCTACAACCTGTGCTAATGACCCTGTGGGTTT  
TACACTTAAAAACACAGTCTGTACCGTCTGCGGTATGTGGAAAGGTTATG  
GCTGTAGTTGTGATCAACTCCGCGAACCCATGCTTCAGTCAGCTGATGCA  
CAATCGTTTTTAAACGGGTTTGCAGGTGAAGTGCAGCCCGTCTTACACCG  
TGCGGCACAGGCACTAGTACTGATGTCGTATACAGGGCTTTTGACATCTA  
CAATGATAAAGTAGCTGGTTTTGCTAAATCCTAAAACTAATTGTTGTC  
GCTTCCAAGAAAAGGACGAAGATGACAATTTAATTGATTCTTACTTTGTA  
GTTAAGAGACACACTTTTCTAACTACCAACATGAAGAAACAATTTATAA  
TTTACTTAAGGATTGTCCAGCTGTTGCTAAACATGACTTCTTTAAGTTTA  
GAATAGACGGTGACATGGTACCACATATATCACGTCAACGTCTTACTAAA  
TACACAATGGCAGACCTCGTCTATGCTTTAAGGCATTTTGATGAAGGTAA  
TTGTGACACATTAAGAAATACTTGTACATACAATTGTTGTGATGATG  
ATTATTTCAATAAAAAGGACTGGTATGATTGAGAAAAATATTTGTTGATG  
GTGTTCCATTTGTAGTTTCAACTGGATACCACTTCAGAGAGCTAGGTGTT  
GTACATAATCAGGATGTAAACTTACATAGCTCTAGACTTAGTTTTAAGGA  
ATTACTTGTGTATGCTGCTGACCCTGCTATGCACGCTGCTTCTGGTAATC  
TATTACTAGATAAACGCACTACGTGCTTTTTCAGTAGCTGCACTTACTAAC  
AATGTTGCTTTTCAAAGTGTCAAACCCGGTAATTTTAAACAAAGACTTCTA  
TGACTTTGCTGTGTCTAAGGGTTTCTTTAAGGAAGGAAGTTCTGTTGAAT  
TAAAACACTTCTTCTTTGCTCAGGATGGTAATGCTGCTATCAGCGATTAT  
GACTACTATCGTTATAATCTACCAACAATGTGTGATATCAGACAACACTACT  
ATTTGTAGTTGAAGTTGTTGATAAGTACTTTGATTGTTACGATGGTGGCT  
GTATTAATGCTAACCAAGTCATCGTCAACAACCTAGACAAATCAGCTGGT  
TTTCCATTAATAAATGGGGTAAGGCTAGACTTTTATTATGATTCAATGAG  
TTATGAGGATCAAGATGCACTTTTTCGCATATACAAAACGTAATGTCATCC  
CTACTATAACTCAAATGAATCTTAAGTATGCCATTAGTGCAAAGAATAGA  
GCTCGCACCGTAGCTGGTGTCTCTATCTGTAGTACTATGACCAATAGACA  
GTTTCATCAAAAATTATTGAAATCAATAGCCGCCACTAGAGGAGCTACTG  
TAGTAATTGGAACAAGCAAATCTATGGTGGTTGGCACAACATGTTAAAA  
ACTGTTTATAGTGATGTAGAAAACCTCACCTTATGGGTTGGGATTATCC  
TAAATGTGATAGAGCCATGCCTAACATGCTTAGAATTATGGCCTCACTTG  
TTCTTGCTCGCAAACATACAACGTGTTGTAGCTTGTACACCGTTTCTAT  
AGATTAGCTAATGAGTGTGCTCAAGTATTGAGTGAAATGGTCATGTGTGG  
CGGTTCACTATATGTTAAACCAGGTGGGACCTCATCAGGAGATGCCACAA  
CTGCTTATGCTAATAGTGTTTTTAACATTTGTCAAGCTGTCACGGCCAAT  
GTTAATGCACTTTTATCTACTGATGGTAACAAAATTGCCGATAAGTATGT  
CCGCAATTTACAACACAGACTTTATGAGTGTCTCTATAGAAATAGAGATG  
TTGACACAGACTTTGTGAATGAGTTTTACGCATATTTGCGTAAACATTTT  
TCAATGATGATACTCTCTGACGATGCTGTTGTGTGTTTCAATAGCACTTA

TGCATCTCAAGGTCTAGTGGCTAGCATAAAGAACTTTAAGTCAGTTCCTT  
ATTATCAAAACAATGTTTTATGTCTGAAGCAAATGTTGGACTGAGACT  
GACCTTACTAAAGGACCTCATGAATTTGCTCTCAACATACAATGCTAGT  
TAAACAGGGTGATGATTATGTGTACCTTCCTTACCCAGATCCATCAAGAA  
TCCTAGGGGCCGGCTGTTTTGTAGATGATATCGTAAAAACAGATGGTACA  
CTTATGATTGAACGGTTCGTGTCTTTAGCTATAGATGCTTACCCACTTAC  
TAAACATCCTAATCAGGAGTATGCTGATGTCTTTCAATTTGACTTACAAT  
ACATAAGAAAGCTACATGATGAGTTAACAGGACACATGTTAGACATGTAT  
TCTGTTATGCTTACTAATGATAACACTTCAAGGTATTGGGAACCTGAGTT  
TTATGAGGCTATGTACACACCCGCATACAGTCTTACAGGCTGTTGGGGCTT  
GTGTTCTTTGCAATTCACAGACTTCATTAAGATGTGGTGCTTGCATACGT  
AGACCATTCTTATGTTGTAAATGCTGTTACGACCATGTCATATCAACATC  
ACATAAATTAGTCTTGTCTGTTAATCCGTATGTTTGAATGCTCCAGGTT  
GTGATGTCACAGATGTGACTCACTTTACTTAGGAGGTATGAGCTATTAT  
TGAAATCACATAAACCACCCATTAGTTTTCCATTGTGTGCTAATGGACA  
AGTTTTTGGTTTATATAAAAATACATGTGTTGGTAGCGATAATGTTACTG  
ACTTTAATGCAATTGCAACATGTGACTGGACAAATGCTGGTGATTACATT  
TTAGCTAACACCTGTACTGAAAGACTCAAGCTTTTTGCAGCAGAAACGCT  
CAAAGCTACTGAGGAGACATTTAACTGTCTTATGGTATTGCTACTGTAC  
GTGAAGTGCTGTCTGACAGAGAATTACATCTTTCATGGGAAGTTGGTAAA  
CCTAGACCACCACTTAACCGAAATTATGTCTTACTGGTTATCGTGTAAC  
TAAAAACAGTAAAGTACAAATAGGAGAGTACACCTTTGAAAAAGGTGACT  
ATGGTGATGCTGTTGTTTACCGAGGTACAACAATTACAAATTAATGTT  
GGTGATTATTTTGTGCTGACATCACATACAGTAATGCCATTAAGTGCACC  
TACACTAGTGCCACAAGAGCACTATGTTAGAATTACTGGCTTATACCCAA  
CACTCAATATCTCAGATGAGTTTTCTAGCAATGTTGCAAATTATCAAAG  
GTTGGTATGCAAAAGTATTCTACACTCCAGGGACCACCTGGTACTGGTAA  
GAGTCATTTTGTATTGGCCTAGCTCTCTACTACCCTTCTGCTCGCATAG  
TGTATACAGCTTGCTCTCATGCCGCTGTTGATGCACTATGTGAGAAGGCA  
TTAAATATTTGCCTATAGATAAATGTAGTAGAATTATACCTGCACGTGC  
TCGTGTAGAGTGTTTTGATAAATTCAAAGTGAATTCAACATTAGAACAGT  
ATGTCTTTTGTACTGTAATGCATTGCCTGAGACGACAGCAGATATAGTT  
GTCTTTGATGAAATTTCAATGGCCACAAATTATGATTTGAGTGTTGTCAA  
TGCCAGATTACGTGCTAAGCACTATGTGTACATTGGCGACCCTGCTCAAT  
TACCTGCACCACGCACATTGCTAACTAAGGGCACACTAGAACCAGAATAT  
TTCAATTCAGTGTGTAGACTTATGAAAATATAGGTCCAGACATGTTCTT  
CGGAACTTGTGCGCGTTGCTCCTGCTGAAATTGTTGCACTGTGAGTGCTT  
TGGTTTATGATAATAAGCTTAAAGCACATAAAGACAAATCAGCTCAATGC  
TTAAAATGTTTTATAAGGGTGTTATCACGCATGATGTTTCATCTGCAAT  
TAACAGGCCACAAATAGGCGTGGTAAGAGAATTCCTTACACGTAACCCTG  
CTTGAGAAAAGCTGTCTTTATTTACCTTATAATTCACAGAATGCTGTA  
GCCTCAAAGATTTTGGGACTACCAACTCAAAGTGTGATTCATCACAGGG  
CTCAGAATATGACTATGTCATATTTCACTCAAACCACTGAAACAGCTCACT  
CTTGTAATGTAAACAGATTTAATGTTGCTATTACCAGAGCAAAAGTAGGC



ATACTTTGCATAATGTCTGATAGAGACCTTTATGACAAGTTGCAATTTAC  
AAGTCTTGAAATTCACGTAGGAATGTGGCAACTTTACAAGCTGAAAATG  
TAACAGGACTCTTAAAGATTGTAGTAAGGTAATCACTGGGTTACATCCT  
ACACAGGCACCTACACACCTCAGTGTGACACTAAATTCAAACTGAAGG  
TTTATGTGTTGACATACCTGGCATACTAAGGACATGACCTATAGAAGAC  
TCATCTCTATGATGGGTTTTAAAATGAATTATCAAGTTAATGGTTACCCT  
AACATGTTTATCACCCGCGAAGAAGCTATAAGACATGTACGTGCATGGAT  
TGGCTTCGATGTCGAGGGGTGTCATGCTACTAGAGAAGCTGTTGGTACCA  
ATTTACCTTACAGCTAGGTTTTTCTACAGGTGTTAACCTAGTTGCTGTA  
CCTACAGGTTATGTTGATACACCTAATAATACAGATTTTTCCAGAGTTAG  
TGCTAAACCACCGCCTGGAGATCAATTTAAACACCTCATACCACTTATGT  
ACAAAGGACTTCCTTGAATGTAGTGCATATAAAGATTGTACAAATGTTA  
AGTGACACACTTAAAAATCTCTCTGACAGAGTCGTATTTGTCTTATGGGC  
ACATGGCTTTGAGTTGACATCTATGAAGTATTTGTGAAAATAGGACCTG  
AGCGCACCTGTTGTCTATGTGATAGACGTGCCACATGCTTTTCCACTGCT  
TCAGACACTTATGCCTGTTGGCATCATTCTATTGGATTTGATTACGTCTA  
TAATCCGTTTATGATTGATGTTCAACAATGGGGTTTTACAGGTAACCTAC  
AAAGCAACCATGATCTGTATTGTCAAGTCCATGGTAATGCACATGTAGCT  
AGTTGTGATGCAATCATGACTAGGTGTCTAGCTGTCCACGAGTGCTTTGT  
TAAGCGTGTGACTGGACTATTGAATATCCTATAATTGGTGATGAACTGA  
AGATTAATGCGGCTTGAGAAAGGTTCAACACATGGTTGTTAAAGCTGCA  
TTATTAGCAGACAAATCCCAGTTCTCACGACATTGGTAACCCTAAAGC  
TATTAAGTGTGTACCTCAAGCTGATGTAGAATGGAAGTTCTATGATGCAC  
AGCCTTGATGACAAAGCTTATAAAATAGAAGAATTATTCTATTCTTAT  
GCCACACATTCTGACAAATTCACAGATGGTGTATGCCTATTTTGAATTG  
CAATGTCGATAGATATCCTGCTAATCCATTGTTTGTAGATTTGACACTA  
GAGTGCTATCTAACCTTAACTTGCCTGGTTGTGATGGTGGCAGTTTGTAT  
GTAAATAAACATGCATTCCACACACCAGCTTTTGATAAAAGTGCTTTTGT  
TAATTTAAAACAATTACATTTTTCTATTACTCTGACAGTCCATGTGAGT  
CTCATGGAAAACAAGTAGTGTGATATAGATTATGTACCACTAAAGTCT  
GCTACGTGTATAACACGTTGCAATTTAGGTGGTGCTGTCTGTAGACATCA  
TGCTAATGAGTACAGATTGTATCTCGATGCTTATAACATGATGATCTCAG  
CTGGCTTTAGCTTGTGGGTTTACAAACAATTTGATACTTATAACCTCTGG  
AACACTTTTACAAGACTTCAGAGTTTAGAAAATGTGGCTTTTAAATGTTGT  
AAATAAGGGACACTTTGATGGACAACAGGGTGAAGTACCAGTTTCTATCA  
TTAATAACACTGTTTACACAAAAGTTGATGGTGTGATGTAGAATTGTTT  
GAAAATAAAACAACATTACCTGTTAATGTAGCATTGAGCTTTGGGCTAA  
GCGCAACATTAACAGTACCAGAGGTGAAAATACTCAATAATTTGGGTG  
TGGACATTGCTGCTAATACTGTGATCTGGGACTACAAAAGAGATGCTCCA  
GCACATATATCTACTATTGGTGTGTTCTATGACTGACATAGCCAAGAA  
ACCAACTGAAACGATTTGTGCACTACTGTCTTTTTTGTGTTGTTAGAG  
TTGATGGTCAAGTAGACTTATTTAGAAATGCCCGTAATGGTGTCTTATT  
ACAGAAGGTAGTGTAAAGGTTTACAACCATCTGTAGGTCCCAAACAAGC  
TAGTCTTAATGGAGTCACATTAATTGGAGAAGCCGTA AAAACACAGTTCA

ATTATTATAAGAAAGTTGATGGTGTTGTCCAACAATTACCTGAAACTTAC  
TTTACTCAGAGTAGAAATTTACAAGAATTTAAACCCAGGAGTCAAATGGA  
AATTGATTTCTTAGAATTAGCTATGGATGAATTCATTGAACGGTATAAAT  
TAGAAGGCTATGCCTTCGAACATATCGTTTATGGAGATTTTAGTCATAGT  
CAGTTAGGTGGTTTACATCTACTGATTGGACTAGCTAAACGTTTTAAGGA  
ATCACCTTTTGAATTAGAAGATTTTATTCTATGGACAGTACAGTTAAAA  
ACTATTTCATAACAGATGCGCAAACAGGTTTCATCTAAGTGTGTGTGTTCT  
GTTATTGATTTACTTGGATGATTTTGTGAAATAATAAAATCCCAAGA  
TTTATCTGTAGTTTCAAGGTTGTCAAAGTGACTATTGACTATACAGAAA  
TTTCATTTATGCTTTGGTGTAAGATGGCCATGTAGAAACATTTTACCCA  
AAATTACAATCTAGTCAAGCGTGGCAACCGGGTGTGCTATGCCTAATCT  
TTACAAAATGCAAAGAATGCTATTAGAAAAGTGTGACCTTCAAATTATG  
GTGATAGTGCAACATTACCTAAAGGCATAATGATGAATGTCGCAAATAT  
ACTCAACTGTGTCAATATTTAAACACATTAACATTAGCTGTACCCTATAA  
TATGAGAGTTATACATTTTGGTGCTGGTTCTGATAAAGGAGTTGCACCAG  
GTACAGCTGTTTTAAGACAGTGGTTGCCTACGGGTACGCTGCTTGTGAT  
TCAGATCTTAATGACTTTGTCTCTGATGCAGATTCAACTTTGATTGGTGA  
TTGTGCAACTGTACATACAGCTAATAAATGGGATCTCATTATTAGTGATA  
TGTACGACCCTAAGACTAAAAATGTTACAAAAGAAAATGACTCTAAAGAG  
GGTTTTTTCACCTACATTTGTGGGTTTATAACAACAAAAGCTAGCTCTTG  
AGGTTCCGTGGCTATAAAGATAACAGAACATTCTTGGAATGCTGATCTTT  
ATAAGCTCATGGGACACTTCGCATGGTGGACAGCCTTTGTTACTAATGTG  
AATGCGTCATCATCTGAAGCATTTTTAATTGGATGTAATTATCTTGGCAA  
ACCACGCGAACAAATAGATGGTTATGTCATGCATGCAAATTACATATTTT  
GGAGGAATACAAATCCAATTCAGTTGTCTTCTATTCTTTATTTGACATG  
AGTAAATTTCCCCTAAATTAAGGGGACTGCTGTTATGTCTTTAAAAGA  
AGGTCAAATCAATGATATGATTTTATCTCTTCTTAGTAAAGGTAGACTTA  
TAATTAGAGAAAACAACAGAGTTGTTATTTCTAGTGATGTTCTTGTTAAC  
AACTAAACGAACAATGTTTGTCTTTCTGTTTTATTGCCACTAGTCTCTA  
GTCAGTGTGTTAATCTTACAACCAGAACTCAATTACCCCTGCATACACT  
AATTCTTTCACACGTGGTGTATTACCCTGACAAAGTTTTTCAGATCCTC  
AGTTTTACATTCAACTCAGGACTTGTCTTACCTTTCTTTCCAATGTTA  
CTTGGTTCCATGCTATACATGTCTCTGGGACCAATGGTACTAAGAGGTTT  
GATAACCCTGTCTACCATTTAATGATGGTGTATTATTTGCTTCCACTGA  
GAAGTCTAACATAATAAGAGGCTGGATTTTTGGTACTACTTTAGATTGGA  
AGACCCAGTCCCTACTTATTGTTAATAACGCTACTAATGTTGTTATTA  
GTCTGTGAATTTCAATTTTGAATGATCCATTTTGGGTGTTTATTACCA  
CAAAAACAACAAAAGTTGGATGGAAAGTGAGTTCAGAGTTTATTCTAGTG  
CGAATAATTGCACTTTTGAATATGTCTCTCAGCCTTTTCTTATGGACCTT  
GAAGGAAAACAGGGTAATTTCAAAAATCTTAGGGAATTTGTGTTAAGAA  
TATTGATGGTTATTTTAAAATATATTCTAAGCACACGCCTATTAATTTAG  
TGCGTGATCTCCCTCAGGGTTTTTCGGCTTTAGAACCATTGGTAGATTTG  
CCAATAGGTATTAACATCACTAGGTTTCAAACCTTACTTGCTTTACATAG  
AAGTTATTTGACTCCTGGTGATTCTTCTCAGGTTGGACAGCTGGTGCTG

CAGCTTATTATGTGGGTTATCTTCAACCTAGGACTTTTCTATTAATAAT  
AATGAAAATGGAACCATTACAGATGCTGTAGACTGTGCACTTGACCCTCT  
CTCAGAAAACAAAGTGTACGTTGAAATCCTTCACTGTAGAAAAAGGAATCT  
ATCAAACCTTCTAACTTTAGAGTCCAACCAACAGAATCTATTGTTAGATTT  
CCTAATATTACAACTTGTGCCCTTTTGGTGAAGTTTTTAACGCCACCAG  
ATTTGCATCTGTTTATGCTTGGAACAGGAAGAGAATCAGCAACTGTGTTG  
CTGATTATTCTGTCCTATATAATTCCGCATCATTTCCTTTTAAAGTGT  
TATGGAGTGTCTCTACTAAATTAATGATCTCTGCTTTACTAATGTCTA  
TGCAGATTCAATTTGTAATTAGAGGTGATGAAGTCAGACAAATCGCTCCAG  
GGCAAACCTGAAAGATTGCTGATTATAATTATAAATTACCAGATGATTTT  
ACAGGCTGCGTTATAGCTTGAATTCTAACAATCTTGATTCTAAGGTTGG  
TGGTAATTATAATTACCTGTATAGATTGTTTAGGAAGTCTAATCTCAAAC  
CTTTTGAGAGAGATATTTCAACTGAAATCTATCAGGCCGGTAGCACACCT  
TGTAATGGTGTGAAGGTTTTAATTGTTACTTTCTTTACAATCATATGG  
TTTCCAACCCACTAATGGTGTGGTTACCAACCATACAGAGTAGTAGTAC  
TTTCTTTGAACTTCTACATGCACCAGCAACTGTTTGTGGACCTAAAAAG  
TCTACTAATTTGGTTAAAAACAAATGTGTCAATTTCAACTTCAATGGTTT  
AACAGGCACAGGTGTTCTTACTGAGTCTAACAAAAAGTTTCTGCCTTTCC  
AACAAATTTGGCAGAGACATTGCTGACACTACTGATGCTGTCCGTGATCCA  
CAAACACTTGAGATTCTTGACATTACCCATGTTCTTTTGGTGGTGTCAA  
TGTTATAACACCAGGAACAAATACTTCTAACCAGGTTGCTGTTCTTTATC  
ATGATGTTAACTGCACAGAAGTCCCTGTTGCTATTTCATGCAGATCAACTT  
ACTCCTACTTGGCGTGTATTCTACAGGTTCTAATGTTTTTCAAACACG  
TGCAGGCTGTTTAAATAGGGGCTGAACATGTCAACAACCTCATATGAGTGTG  
ACATACCCATTGGTGCAGGTATATGCGCTAGTTATCAGACTCAGACTAAT  
TCTCCTCGGCGGGCACGTAGTGTAGCTAGTCAATCCATCATTGCCTACAC  
TATGTCACTTGGTGCAAAAATTCAGTTGCTTACTCTAATAACTCTATTG  
CCATACCCACAAATTTTACTATTAGTGTACCACAGAAATCTACCAGTG  
TCTATGACCAAGACATCAGTAGATTGTACAATGTACATTTGTGGTGATTC  
AACTGAATGCAGCAATCTTTTGTGCAATATGGCAGTTTTTGTACACAAT  
TAAACCGTGCTTTAACTGGAATAGTGTGAACAAGACAAAAACACCCAAG  
AAGTTTTTGCACAAGTCAAACAAATTTACAAAACACCACCAATTAAGAT  
TTTGGTGGTTTTAATTTTCACAAATATTACCAGATCCATCAAAAACCAAG  
CAAGAGGTCATTTATTGAAGATCTACTTTTCAACAAAGTGACACTTGCAG  
ATGCTGGCTTCATCAAACAATATGGTGATTGCCTTGGTGATATTGCTGCT  
AGAGACCTCATTTGTGCACAAAAAGTTAACGGCCTTACTGTTTTGCCACC  
TTTGCTCACAGATGAAATGATTGCTCAATACACTTCTGCACTGTTAGCGG  
GTACAATCACTTCTGGTTGGACCTTTGGTGCAGGTGCTGCATTACAAATA  
CCATTTGCTATGCAATGGCTTATAGGTTAATGGTATTGGAGTTACACA  
GAATGTTCTTTATGAGAACCAAAAATTTGATTGCCAACCAATTTAATAGTG  
CTATTGGCAAAAATTCAGACTCACTTTCTCCACAGCAAGTGCACCTTGG  
AAACTTCAAGATGTGGTCAACCAAAAATGCACAAGCTTTAAACACGCTTGT  
TAAACAACCTAGCTCCAATTTTGGTGCAATTTCAAGTGTTTTAAATGATA  
TCCTTTCACGTCTTGACAAAAGTTGAGGCTGAAGTGCAAATGATAGGTTG

ATCACAGGCAGACTTCAAAGTTTGCAGACATATGTGACTCAACAATTAAT  
TAGAGTTGCAGAAATCAGAGCTTCTGCTAATCTTGCTGCTACTAAAATGT  
CAGAGTGTGACTTGGACAATCAAAAAGAGTTGATTTTTGTGGAAAGGGC  
TATCATCTTATGTCCTTCTTCAGTCAGCACCTCATGGTGTAGTATTCTT  
GCATGTGATTATGTCCCTGCACAAGAAAAGAACTTCACAACCTGCTCCTGC  
CATTTGTCATGATGGAAAAGCACACTTTCCTCGTGAAGGTGCTTTGTTT  
CAAATGGCACACACTGGTTTGTAAACAAAAGGAATTTTTATGAACCACAA  
ATCATTACTACAGACAACACATTTGTGTCTGGTAACTGTGATGTTGTAAT  
AGGAATTGTCAACAACACAGTTTATGATCCTTTGCAACCTGAATTAGACT  
CATTCAAGGAGGAGTTAGATAAATATTTAAGAATCATACATCACCAGAT  
GTTGATTTAGGTGACATCTCTGGCATTAAATGCTTCAGTTGTAAACATTCA  
AAAAGAAATTGACCGCTCAATGAGGTTGCCAAGAATTTAAATGAATCTC  
TCATCGATCTCCAAGAAGTTGGAAAGTATGAGCAGTATATAAAATGGCCA  
TGGTACATTTGGCTAGGTTTTATAGCTGGCTTGATTGCCATAGTAATGGT  
GACAATTATGCTTTGCTGTATGACCAGTTGCTGTAGTTGTCTCAAGGGCT  
GTTGTTCTTGTGGATCCTGCTGCAAATTTGATGAAGACGACTCTGAGCCA  
GTGCTCAAAGGAGTCAAATTACATTACACATAAACGAACTTATGGATTTG  
TTTATGAGAATCTTACAATTGGAAGTAACTTTGAAGCAAGGTGAAAT  
CAAGGATGCTACTCCTTCAAGTTTTGTTGCGCTACTGCAACGATACCGA  
TACAAGCCTCACTCCCTTTCGGATGGCTTATTGTTGGCGTTGCACTTCTT  
GCTGTTTTTTCAGAGCGCTTCCAAAATCATAACCCTCAAAAAGAGATGGCA  
ACTAGCACTCTCCAAGGGTGTTCACCTTTGTTTGAACCTGCTGTTGTTGT  
TTGTAACAGTTTACTCACACCTTTTGTCTGTTGCTGCTGGCCTTGAAGCC  
CCTTTTCTCTATCTTTATGCTTTAGTCTACTTCTTGCAGAGTATAAACTT  
TGTAAGAATAATAATGAGGCTTTGGCTTTGCTGGAAATGCCGTTCCAAAA  
ACCCATTACTTTATGATGCCAACTATTTTCTTTGCTGGCATACTAATTGT  
TACGACTATTGTATACCTTACAATAGTGAACCTTCTCAATTGTCATTAC  
TTCAGGTGATGGCACAACAAGTCCTATTTCTGAACATGACTACCAGATTG  
GTGGTTATACTGAAAAATGGGAATCTGGAGTAAAAGACTGTGTTGTATTA  
CACAGTTACTTCACTTCAGACTATTACCAGCTGTAACCACTCAATTGAG  
TACAGACACTGGTGTGAAACATGTTACCTTCTTCTACAATAAAATTG  
TTGATGAGCCTGAAGAACATGTCCAAATTCACACAATCGACGGTTCATCC  
GGAGTTGTTAATCCAGTAATGGAACCAATTTATGATGAACCGACGACGAC  
TACTAGCGTGCCTTTGTAAGCACAAGCTGATGAGTACGAACTTATGTACT  
CATTCGTTTCGGAAGAGACAGGTACGTTAATAGTTAATAGCGTACTTCTT  
TTTCTTGCTTTCGTGGTATTCTTGCTAGTTACACTAGCCATCCTTACTGC  
GCTTCGATTGTGTGCGTACTGCTGCAATATTGTTAACGTGAGTCTTGTA  
AACCTTCTTTTACGTTTACTCTCGTGTTAAAAATCTGAATTCTTCTAGA  
GTTCTGATCTTCTGGTCTAAACGAACTAAATATTATATTAGTTTTTCTG  
TTTGGAACTTTAATTTTAGCCATGGCAGATTCCAACGGTACTATTACCGT  
TGAAGAGCTTAAAAAGCTCCTTGAACAATGGAACCTAGTAATAGGTTTCC  
TATTCCTTACATGGATTTGCTTCTACAATTTGCCTATGCCAACAGGAAT  
AGGTTTTTGTATATAATTAAGTTAATTTTCTCTGGCTGTTATGGCCAGT  
AACTTTAGCTTGTGTTTGTGCTGCTGCTGTTTACAGAATAAATTGGATCA

CCGGTGAATTGCTATCGCAATGGCTTGTCTTGTAGGCTTGATGTGGCTC  
AGCTACTTCATTGCTTCTTTCAAACCTGTTTGC GCGTACGCGTTCATGTG  
GTCATTCAATCCAAAACTAACATTCTTCTCAACGTGCCACTCCATGGCA  
CTATTCTGACCAGACCGCTTCTAGAAAAGTGAACCTCGAAATCGGAGCTGTG  
ATCCTTCGTGGACATCTTCATATAGCTGGACACCATCTAGGACGCTGTGA  
CATCAAGGACCTGCCTAAAGAAATCACTGTTGCTACATCACGAACGCTTT  
CTTATTACAAATTGGGAGCTTCGCAGCGTGTAGCAGGTGACTCAGGTTTT  
GCTGCATACAGTCGCTACAGGATTGGCAACTATAAATTAACACAGACCA  
TTCCAGTAGCAGTGACAATATTGCTTTGCTTGTACAGTAAGTGACAACAG  
ATGTTTCATCTCGTTGACTTTGAGTTACTATAGCAGAGATATTATATTA  
CTAATTATTATGAGGACTTTTAAAGTTTCCATTTGGAATCTTGATTACAT  
CATAAACCTCATAATTAATAAATTTATCTAAGTCACTAACTGAGAATAAAT  
ATTCTCAATTAGATGAAGAGCAACCAATGGAGATTGATTAACGAACATG  
AAAATTATTCTTTCTTGGCACTGATAACACTCGCTACTTGTGAGCTTTA  
TCACTACCAAGAGTGTGTTAGAGGTACAACAGTACTTTTAAAAGAACCTT  
GCTCTTCTGGAACATACGAGGGCAATTCACCATTTTCATCCTCTAGCTGAT  
AACAAATTTGCACTGACTTGTCTTAGCACTCAATTTGCTTTTGCTTGCC  
TGACGGCGTAAAACACGTCTATCAGTTACGTGCCAGATCAGTTTCACCTA  
AACTGTTTCATCAGACAAGAGGAAGTTCAAGAACTTTACTCTCCAATTTTT  
CTTATTGTTGCGGCAATAGTGTTTATAACACTTTGCTTCACACTCAAAG  
AAAGACAGAAATGATTGAACCTTCATTAATTGACTTCTATTTGTGCTTTTT  
AGCCTTTCTGCTATTCTTGTTTAATTATGCTTATTATCTTTTGGTTCT  
CACTTGAACCTGCAAGATCATAATGAAACTTGTACGCCTAAACGAACATG  
AAATTTCTGTTTTCTTAGGAATCATCACAACCTGTAGCTGCATTTACCA  
AGAATGTAGTTTACAGTCATGTAACATCAACCATATGTAGTTGATG  
ACCCGTGTCCTATTCACCTTCTATTCTAAATGGTATATTAGAGTAGGAGCT  
AGAAAATCAGCACCTTTAATTGAATTGTGCGTGGATGAGGCTGGTTCTAA  
ATCACCCATTGATACATCGATATCGGTAATTATACAGTTTCCTGTTTAC  
CTTTTACAATTAATTGCCAGGAACCTAAATTGGGTAGTCTTGTAGTGCCT  
TGTTCTGTTCTATGAAGACTTTTTAGAGTATCATGACGTTCTGTTGTTTT  
AGATTTTCATCTAAACGAACAACTAAAATGTCTGATAATGGACCCAAAA  
TCAGCGAAATGCACCCCGCATTACGTTTGGTGGACCCTCAGATTCAACTG  
GCAGTAACCAGAATGGAGAACGCAGTGGGGCGCGATCAAACAACGTCGG  
CCCCAAGGTTTACCCAATAATACTGCGTCTTGGTTACCGCTCTCACTCA  
ACATGGCAAGGAAGACCTTAAATCCCTCGAGGACAAGGCGTTCCAATTA  
ACACCAATAGCAGTCCAGATGACCAAATTGGCTACTACCGAAGAGCTACC  
AGACGAATTCGTGGTGGTGACGGTAAAATGAAAGATCTCAGTCCAAGATG  
GTATTTCTACTACCTAGGAACCTGGGCCAGAAGCTGGACTTCCCTATGGTG  
CTAACAAAGACGGCATCATATGGGTTGCAACTGAGGGAGCCTTGAATACA  
CCAAAAGATCACATTGGCACCCGCAATCCTGCTAACAATGCTGCAATCGT  
GCTACAACCTTCTCAAGGAACAACATTGCCAAAAGGCTTCTACGCAGAAG  
GGAGCAGAGGCGGCAGTCAAGCCTTCTCGTTCCTCATCACGTAGTCGC  
AACAGTTCAAGAAATTCAACTCCAGGCAGCAGTAGGGGAACCTTCTCTGC  
TAGAATGGCTGGCAATGGCGGTGATGCTGCTCTTGTCTTGTGCTGCTTG

ACAGATTGAACCAGCTTGAGAGCAAAATGTCTGGTAAAGGCCAACAA  
CAAGGCCAAACTGTCACTAAGAAATCTGCTGCTGAGGCTTCTAAGAAGCC  
TCGGCAAAAACGTA CTG CCACTAAAGCATAACAATGTAACACAAGCTTTCG  
GCAGACGTGGTCCAGAACAACCCAAGGAAATTTTGGGGACCAGGAACTA  
ATCAGACAAGGAACTGATTACAAACATTGGCCGCAAATTGCACAATTTGC  
CCCCAGCGCTTCAGCGTTCCTCGGAATGTCGCGCATTGGCATGGAAGTCA  
CACCTTCGGGAACGTGGTTGACCTACACAGGTGCCATCAAATTGGATGAC  
AAAGATCCAAATTTCAAAGATCAAGTCATTTTCTGGAATAAGCATATTGA  
CGCATACAAAACATTCCCACCAACAGAGCCTAAAAAGGACAAAAGAAGA  
AGGCTGATGAAACTCAAGCCTTACCGCAGAGACAGAAGAAACAGCAAAT  
GTGACTCTTCTCCTGCTGCAGATTTGGATGATTTCTCCAAACAATTGCA  
ACAATCCATGAGCAGTGCTGACTCAACTCAGGCCTAAACTCATGCAGACC  
ACACAAGGCAGATGGGCTATATAAACGTTTTTCGCTTTTCCGTTTACGATA  
TATAGTCTACTCTTGTGCAGAATGAATTCTCGTAACTACATAGCACAAGT  
AGATGTAGTTAACTTTAATCTCACATAGCAATCTTTAATCAGTGTGTAAC  
ATTAGGGAGGACTTGAAAGAGCCACCACATTTTCACCGAGGCCACGCGGA  
GTACGATCGAGTGTACAGTGAACAATGCTAGGGAGAGCTGCCTATATGGA  
AGAGCCCTAATGTGTAAAATTAATTTTAGTAGTGCTATCCCCATGTGATT  
TTAATAGCTTCTTAGGAGAATGACAAAAAAA
