# Supplementary material
Source: HighWire-hosted journal article supplement (https://gut.bmj.com/content/69/6/1002)
Supplement: inline-supplementary-material-2 [file inline-supplementary-material-2.pdf]

**Supplementary Table 1.** Univariate analysis of risk factors for the severe/critical type patients in COVID-19 patients with GI symptoms

| Risk Factor                                           | Odds Ratio<br>(95% CI) | p-value |
|-------------------------------------------------------|------------------------|---------|
| Age                                                   | 1.048 (1.01-1.09)      | 0.013   |
| Age $\geq$ 50                                         | 4.35 (1.62-11.67)      | 0.004   |
| From infected area                                    | 0.33 (0.13-0.85)       | 0.022   |
| Period between illness onset<br>and hospital visiting | 1.27 (1.014-1.59)      | 0.037   |
| Sputum production                                     | 3.44 (1.29-9.67)       | 0.013   |
| Any existing medical<br>condition                     | 2.81 (1.03-7.62)       | 0.043   |
| Multiple lung infection                               | 3.15 (1.16-8.53)       | 0.024   |
| Increased ALT                                         | 4.57 (1.31-15.90)      | 0.017   |
| Increased LDH                                         | 12.00 (3.90-36.97)     | 0.000   |
| Glucose                                               | 1.81(1.27-2.58)        | 0.001   |
| C-reactive protein                                    | 1.03 (1.00-1.06)       | 0.033   |
